# Supplementary material for: SARS-CoV-2-Seronegative Subjects Target CTL Epitopes in the SARS-CoV-2 Nucleoprotein Cross-Reactive to Common Cold Coronaviruses
Source: PubMed Central journal article supplement (PMC8113865; doi:10.3389/fimmu.2021.627568), 2021-04-28
Supplement: DataSheet_1.pdf [file DataSheet_1.pdf]

**Supplementary Figure 1:**

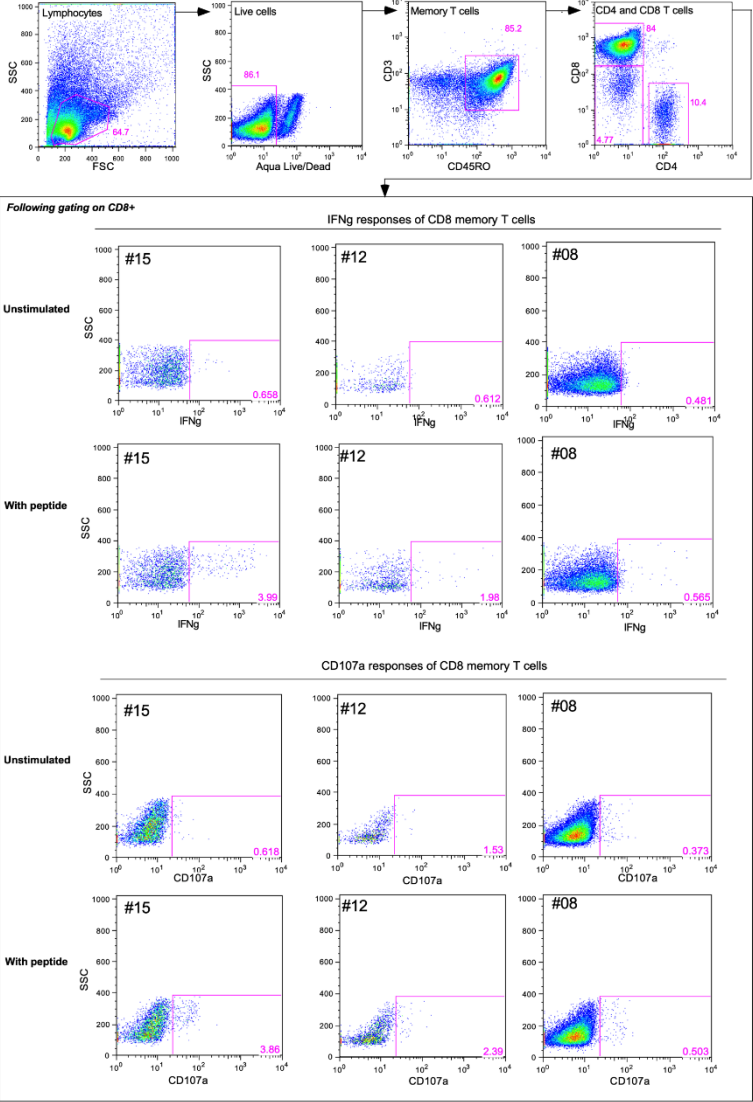

**Fig. S1. Gating Strategy for intracellular cytokine staining (ICS).** After gating on lymphocytes and subsequent exclusion of dead cells via viability staining memory T-cells (CD45RO<sup>+</sup>) were gated. The following gate was set on CD4<sup>+</sup> or CD8<sup>+</sup> cells, in those populations the percentage of IFN- $\gamma$ <sup>+</sup> and CD107a<sup>+</sup> cells was analyzed. Shown are representative examples of three subjects.

**Supplementary Figure 2:**

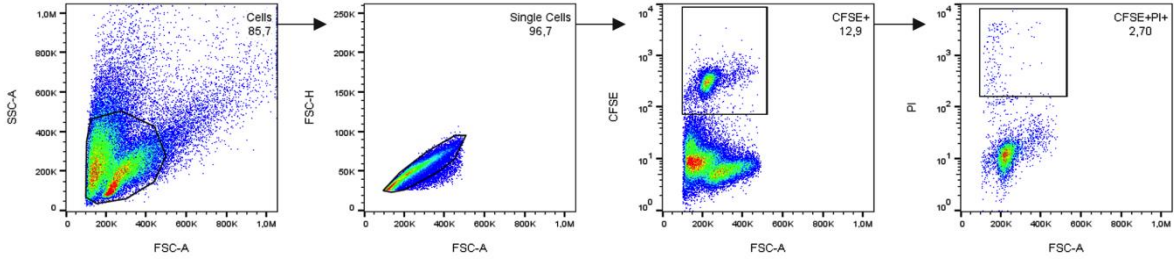

**Fig. S2. Gating Strategy for CTL killing assay.** After excluding debris via FSC/SSC, single cells were gated. The subsequent gate was set on CFSE<sup>+</sup> cells, followed by gating of PI<sup>+</sup> cells. Abbreviations: SSC: side scatter, FSC-A: forward scatter area, FSC-H: forward scatter height.

**Supplementary Table 1: Characteristics of patients with recognition of SCoV-DP15.**

| ID | Sex | Age | Know Expo-sure | Respiratory Symptoms |               | HIV-Infection | Viral load | Therapy              | CD4+ T-cells | CD8+ T-cells |
|----|-----|-----|----------------|----------------------|---------------|---------------|------------|----------------------|--------------|--------------|
|    |     |     |                | Current              | Since 01.2020 |               |            |                      |              |              |
| 1  | M   | 59  | N              | 0                    | 0             | N             | N          | None                 | N/A          | N/A          |
| 2  | F   | 19  | N              | 0                    | 0             | N             | N          | None                 | N/A          | N/A          |
| 3  | F   | 62  | Y              | 0                    | 0             | N             | N          | None                 | N/A          | N/A          |
| 4  | F   | 39  | Y              | 0                    | 0             | N             | N          | None                 | N/A          | N/A          |
| 5  | M   | 24  | N              | 0                    | 0             | Y             | <20        | LPV/r/RAL/RPV        | 1282         | 709          |
| 6  | F   | 57  | N              | 0                    | 0             | Y             | <20        | FTC/TAF/COB/EVG      | 556          | 519          |
| 7  | M   | 58  | N              | 0                    | 0             | Y             | <20        | FTC/TAF/COB/EVG      | 554          | 316          |
| 8  | M   | 37  | N              | PA                   | 0             | Y             | <20        | DRV/COB/FTC/TAF, RPV | 520          | 1301         |
| 9  | M   | 54  | N              | 0                    | 0             | Y             | 20         | FTC/TDF, EFV         | 999          | 529          |
| 10 | F   | 29  | N              | 0                    | 0             | Y             | <20        | FTC/TDF, RAL         | 701          | 684          |
| 11 | M   | 54  | N              | 0                    | 0             | Y             | <20        | FTC/TAF/COB/EVG      | 797          | 708          |
| 12 | M   | 38  | N              | 0                    | 0             | Y             | <20        | FTC/TAF/COB/EVG      | 795          | 867          |
| 13 | F   | 58  | N              | 0                    | 0             | Y             | 50         | BIC/FTC/TAF          | 1114         | 836          |
| 14 | M   | 68  | N              | 0                    | 0             | Y             | <20        | BIC/FTC/TAF          | 728          | 507          |
| 15 | M   | 66  | N              | 0                    | 0             | Y             | <20        | BIC/FTC/TAF          | 348          | 218          |
| 16 | F   | 49  | N              | 0                    | CC, ST        | Y             | <20        | EFV/FTC/TDF          | 1075         | 358          |
| 17 | M   | 40  | N              | 0                    | 0             | Y             | <20        | BIC/FTC/TAF          | 781          | 1011         |
| 18 | M   | 44  | N              | 0                    | 0             | Y             | 20         | DRV/r, DTG,ETR       | 630          | 1013         |
| 19 | F   | 45  | N              | 0                    | 0             | Y             | 20         | BIC/FTC/TAF          | 496          | 848          |
| 20 | M   | 63  | N              | 0                    | 0             | Y             | <20        | ABC/3TC/DTG          | 309          | 452          |
| 21 | F   | 37  | N              | 0                    | FI 01/20      | Y             | <20        | DRV/COB/FTC/TAF      | 484          | 405          |
| 22 | F   | 58  | N              | 0                    | 0             | Y             | <20        | FTC/TDF,RAL          | 390          | 205          |
| 23 | F   | 39  | N              | C, R, SB             | C, R, SB      | Y             | <20        | BIC/FTC/TAF          | 232          | 392          |
| 24 | F   | 39  | N              | 0                    | 0             | Y             | <20        | DRV/r, FTC/TDF       | 487          | 578          |
| 25 | M   | 59  | N              | 0                    | 0             | Y             | 60         | FTC/TAF/COB/EVG      | 370          | 773          |
| 26 | M   | 49  | N              | DC                   | FI 02/20      | Y             | 20         | BIC/FTC/TAF          | 650          | 729          |

|    |   |    |   |                           |                           |   |     |                       |      |      |
|----|---|----|---|---------------------------|---------------------------|---|-----|-----------------------|------|------|
| 27 | F | 30 | N | 0                         | C, F 02/20                | Y | <20 | DRV/r, FTC/TDF        | 907  | 774  |
| 28 | M | 36 | N | 0                         | 0                         | Y | <20 | BIC/FTC/TAF           | 540  | 526  |
| 29 | M | 63 | N | 0                         | 0                         | Y | <20 | BIC/FTC/TAF           | 381  | 1397 |
| 30 | M | 55 | N | C, Ho                     | FL 03/20                  | Y | <20 | BIC/FTC/TAF           | 996  | 1127 |
| 31 | M | 63 | N | 0                         | 0                         | Y | 20  | ABC/3TC/DTG           | 311  | 346  |
| 32 | M | 66 | N | 0                         | 0                         | Y | <20 | FTC/TAF/BIC           | 584  | 584  |
| 33 | M | 49 | N | 0                         | RI 03/20                  | Y | <20 | ABC/3TC/DTG           | 987  | 751  |
| 34 | M | 52 | N | 0                         | 0                         | Y | <20 | FTC/TAF/BIC           | 950  | 1130 |
| 35 | M | 45 | N | 0                         | 0                         | Y | <20 | FTC/TAF/COB/<br>EVG   | 516  | 937  |
| 36 | M | 38 | N | 0                         | 0                         | Y | <20 | DRV/COB/FTC/<br>TAF   | 691  | 549  |
| 37 | M | 54 | N | 0                         | 0                         | Y | <20 | ABC/3TC,EFV           | 765  | 659  |
| 38 | F | 57 | N | 0                         | RI 03/20                  | Y | <20 | ABC/3TC,RAL           | 382  | 973  |
| 39 | M | 59 | N | RA                        | CC, ST<br>03/20           | Y | <20 | FTC/TAF,AZV/r<br>DTG  | 696  | 480  |
| 40 | M | 54 | N | RA                        | 0                         | Y | <20 | FTC/TAF/BIC           | 421  | 723  |
| 41 | M | 31 | N | 0                         | 0                         | Y | <20 | FTC/TAF/BIC           | 1166 | 768  |
| 42 | M | 43 | N | 0                         | 0                         | Y | <20 | FTC/TDF/EFV           | 615  | 476  |
| 43 | M | 52 | N | 0                         | 0                         | Y | <20 | ABC/3TC, EFV          | 634  | 888  |
| 44 | M | 70 | N | 0                         | 0                         | Y | 20  | DRV/r,FTC/TAF,<br>DTG | 183  | 711  |
| 45 | M | 53 | N | 0                         | 0                         | Y | <20 | FTC/TAF/BIC           | 417  | 544  |
| 46 | M | 56 | N | 0                         | 0                         | Y | <20 | DRV/r,FTC/TAF         | 329  | 200  |
| 47 | M | 52 | N | 0                         | 0                         | Y | 20  | ABC/3TC/DTG           | 972  | 1372 |
| 48 | M | 56 | N | 0                         | 0                         | Y | <20 | FTC/TDF,RPV           | 658  | 493  |
| 49 | F | 62 | I | <b>COVID-19<br/>04/20</b> | 0                         | N | N   | None                  | 540  | 132  |
| 50 | M | 56 | I | D                         | <b>COVID-19<br/>04/20</b> | Y | <20 | FTC/TAF/BIC           | 1034 | 643  |

Abbreviations: M: male, F: female; I: infected: patients #49 and #50 had COVID-19. N: No, Y: Yes, AL: aching limbs, C: cough, CC: common cold, D: slight cyspnoe, DC: dry cough, F: fever, FI: flu-like infection, H: headache, Ho: hoarseness, PA: pollen allergy, R: rhinitis, RA: rhinitis allergica, RI: respiratory infection, SB: shortness of breath, ST: sore throat.

**Supplementary Table 2: Raw data of peptide titration experiments.**

|                  | 100µg/ml | 20µg/ml | 10µg/ml | 1µg/ml | 100ng/ml | 10ng/ml | w/o.<br>peptide |
|------------------|----------|---------|---------|--------|----------|---------|-----------------|
| <b>SL9</b>       |          | 2000    | 2000    | 2000   | 390      | 64.5    | 83              |
| <b>LL9</b>       |          | 2000    | 2000    | 2000   | 726.5    | 82.5    | 86.5            |
| <b>DY10</b>      | 244.5    |         | 283.5   | 240.5  | 190      | 115.5   | 98.5            |
| <b>T2 + DY10</b> |          | 159     | 109     | 82     | 1        | 1       | 1               |

Raw data of peptide titration experiments depicted in figures 4B, 6D and 6E. Shown are means of duplicates of SFUs at the indicated peptide concentrations per  $1 \times 10^5$  cells in the ELISpot assays. DY10 (SCoV-DY10) titration of T-cells from subject #15 corresponds to figure 6D. Titration data of T cell line #26 with DY10 presented by the T2 cell line corresponds to figure 6E. SL9 (SCoV-SL9) and LL9 (OC43-LL9) titration data of T cell line from donor #33 correspond to the graph in figure 4B.
